# Supplementary material
Source: bioRxiv or medRxiv preprint supplement (https://www.biorxiv.org/highwire/filestream/72700/field_highwire_adjunct_files/9/237255-8.pdf)
Supplement: Supplementary file [file 237255-8.pdf]

**Table S8. List of primers used in this study.**

| Gene model name                          | Application                      | Primer pair                                          | Sequence 5' – 3'                                                |
|------------------------------------------|----------------------------------|------------------------------------------------------|-----------------------------------------------------------------|
| <i>Vna4.761</i>                          | RT-qPCR                          | CHR4.761-F<br>CHR4.761-R                             | CAACGGCGATGCACACATTA<br>CGCAGCCTCCGGTGATC                       |
| <i>Vna5.694</i>                          | RT-qPCR                          | CHR5.694-F<br>CHR5.694-R                             | CCTGGCGACTACACTCCTCCTA<br>CAGACCTGCCAGCCTTGCT                   |
| <i>Vna7.443</i>                          | RT-qPCR                          | CHR7.443-F<br>CHR7.443-R                             | TGGCAGCTGGTATCCTGG<br>GTTCCCTTGCCCTCGTACTT                      |
| <i>Vna8.691</i>                          | RT-qPCR                          | CHR8.691-F<br>CHR8.691-R                             | CCAAGGGAGGATACAGCACCTA<br>CCTCGCTGAGATCCTTCTGTAC                |
| <i>VnaUn.279</i>                         | RT-qPCR                          | UN.279-F<br>UN.279-R                                 | TTCCCATTACAGCCCTTTTCAC<br>CGGCCCTCCATGGACAAGA                   |
| <i>Vna8.801</i><br>(splicing factor 3a2) | RT-qPCR                          | SF-F<br>SF-R                                         | GCGCTCGAGACGATCAACCT<br>AGGTACGAGCCGTCGTTCTG                    |
| <i>VnaUn.148</i><br>(DNA topoisomerase)  | RT-qPCR                          | Top-F<br>Top-R                                       | GCATGGTTTTTCGGATCCAT<br>TACCTCGCGAAATCCTCAA                     |
| <i>Vna5.694</i>                          | KO <sup>b</sup>                  | 5.694-O1-F <sup>a</sup><br>5.694-O2-R <sup>a</sup>   | GGTCTTAAUACACATCTGCGAGCACTGAG<br>GGCATTAAUTGTTGGCGTGTGTGAAGAT   |
|                                          | KO <sup>c</sup>                  | 5.694-A3-F <sup>a</sup><br>5.694-A4-R <sup>a</sup>   | GGA CTTAAUATAAGTGGCAAGCGGTTTT<br>GGGTTAAUGTTGTCTCGAGCCGTTTGT    |
|                                          | KO <sup>d</sup>                  | 5.694-T1-F <sup>a</sup><br>5.694-T2-R <sup>a</sup>   | ATGCAGTTCCTCACTCTCCT<br>CTAAATGCAGTAGGGGCTCT                    |
|                                          | KO <sup>e</sup>                  | 5.694-T4-F <sup>a</sup><br>RF-2                      | GGGAAAAGCGGCAGATATTA<br>TCTCCTTGCATGCACCATTCCCTTG               |
|                                          | KO <sup>e</sup>                  | 5.694-T3-F <sup>a</sup><br>RF-1                      | AGGTGGTTGTGGAAGTCTGG<br>AAATTTTGTGCTCACCGCCTGGAC                |
| <i>Vna7.443</i>                          | KO <sup>b</sup>                  | 7.443-O1-F <sup>a</sup><br>7.443-O2-R <sup>a</sup>   | GGTCTTAAUCACGAGCCTCTCTGTGTG<br>GGCATTAAUTGGTGTGGGTTGGGTAGAT     |
|                                          | KO <sup>c</sup>                  | 7.443-A3-F <sup>a</sup><br>7.443-A4-R <sup>a</sup>   | GGA CTTAAUGGTTCTCCTCCATCCTCTT<br>GGGTTAAUCCCTACATTTGCCTTGCATT   |
|                                          | KO <sup>d</sup>                  | 7.443-T1-F <sup>a</sup><br>7.443-T2-R <sup>a</sup>   | ATGCGCTACTCCCTTACTCTC<br>TCACTGCTCAGGGTGCCACTT                  |
|                                          | KO <sup>e</sup>                  | 7.443-T4-F <sup>a</sup><br>RF-2                      | CATTGTCGAGGCTGGCTATT<br>TCTCCTTGCATGCACCATTCCCTTG               |
|                                          | KO <sup>e</sup>                  | 7.443-T3-F <sup>a</sup><br>RF-1                      | CACTCAGCATCCGTGACAGT<br>AAATTTTGTGCTCACCGCCTGGAC                |
| <i>Vna8.691</i>                          | KO <sup>b</sup>                  | 8.691-O1-F <sup>a</sup><br>8.691-O2-R <sup>a</sup>   | GGTCTTAAUAGATTGAGGGGAAACCCTGT<br>GGCATTAAUCATCGCCTCAAGAAGTCCTC  |
|                                          | KO <sup>c</sup>                  | 8.691-A3-F <sup>a</sup><br>8.691-A4-R <sup>a</sup>   | GGA CTTAAUGCGTTGATCAATGGTCATGT<br>GGGTTAAUCTGAGACTTCTCCGCCTCAC  |
|                                          | KO <sup>d</sup>                  | 8.691-T1-F <sup>a</sup><br>8.691-T2-R <sup>a</sup>   | ATGGGAGACCAACGAACA<br>CTATTCTCGGCATCCTG                         |
|                                          | KO <sup>e</sup>                  | 8.691-T4-F <sup>a</sup><br>RF-2                      | GGACCATGCCGAGACATAAC<br>TCTCCTTGCATGCACCATTCCCTTG               |
|                                          | KO <sup>e</sup>                  | 8.691-T3-F <sup>a</sup><br>RF-1                      | CACTCGATCCTGCAACAAAG<br>AAATTTTGTGCTCACCGCCTGGAC                |
| <i>VnaUn.279</i>                         | KO <sup>b</sup>                  | UN.279-O1-F <sup>a</sup><br>UN.279-O2-R <sup>a</sup> | GGTCTTAAUAGTTGTGTAACGGCCCTAGC<br>GGCATTAAUTCACGCCTTTAGGAATTATCC |
|                                          | KO <sup>c</sup>                  | UN.279-A3-F <sup>a</sup><br>UN.279-A4-R <sup>a</sup> | GGA CTTAAUTGGATTGAGGTTTCCGACAT<br>GGGTTAAUTACGCCATCATCCAAGACAG  |
|                                          | KO <sup>d</sup>                  | UN.279-T1-F <sup>a</sup><br>UN.279-T2-R <sup>a</sup> | GCAGAGCAGGAGGATACGTC<br>GAATGCTGCCAGAAGTGCA                     |
|                                          | KO <sup>e</sup>                  | UN.279-T4-F <sup>a</sup><br>RF-2                     | GCAGAGCAGGAGGATACGTC<br>TCTCCTTGCATGCACCATTCCCTTG               |
|                                          | KO <sup>e</sup>                  | RF-1<br>UN.279-T3-R <sup>a</sup>                     | AAATTTTGTGCTCACCGCCTGGAC<br>GAATGCTGCCAGAAGTGCA                 |
| AFLP-9-1 <sup>f</sup>                    | fungal biomass<br>quantification | 9-1gs-F<br>9-1gs-R                                   | GGTAACGTCATCGAACGACATC<br>CACACGCTACATATCAAACAGCATAT            |
